# Supplementary material for: The Aurora Kinase Inhibitor TAK901 Inhibits Glioblastoma Growth by Blocking SREBP1-Mediated Lipid Metabolism
Source: MDPI journal article supplement (doi:10.3390/cancers14235805), 2022-11-25

**Supplementary Figure S1.** GSEA and heatmap of gene expression by RNA-seq in U87MG and GSC5 cells after TAK901 treatment. TAK901 suppresses the expression of genes related to lipid metabolism. U87MG cells were treated with 0.2  $\mu$ M TAK901 or vehicle for 72h. GSC5 cells were treated with 0.1  $\mu$ M TAK901 or vehicle for 72h. The cells were subjected to transcriptomic analysis. n=2.

- (A) Heatmaps showing the robustness of the RNA-seq data in U87MG and GSC5 cells.
- (B) Gene set enrichment analysis plot of U87MG (top) and GSC5 (bottom) treated with TAK901 (left) versus control (right). Cholesterol homeostasis is shown.
- (C) Correlation of the expression of lipid metabolism-related genes in the RNA-seq data.
- (D) Heat map of gene expression analyzed by RNA-seq in U87MG and GSC5 cells after TAK901 treatment for 72h.

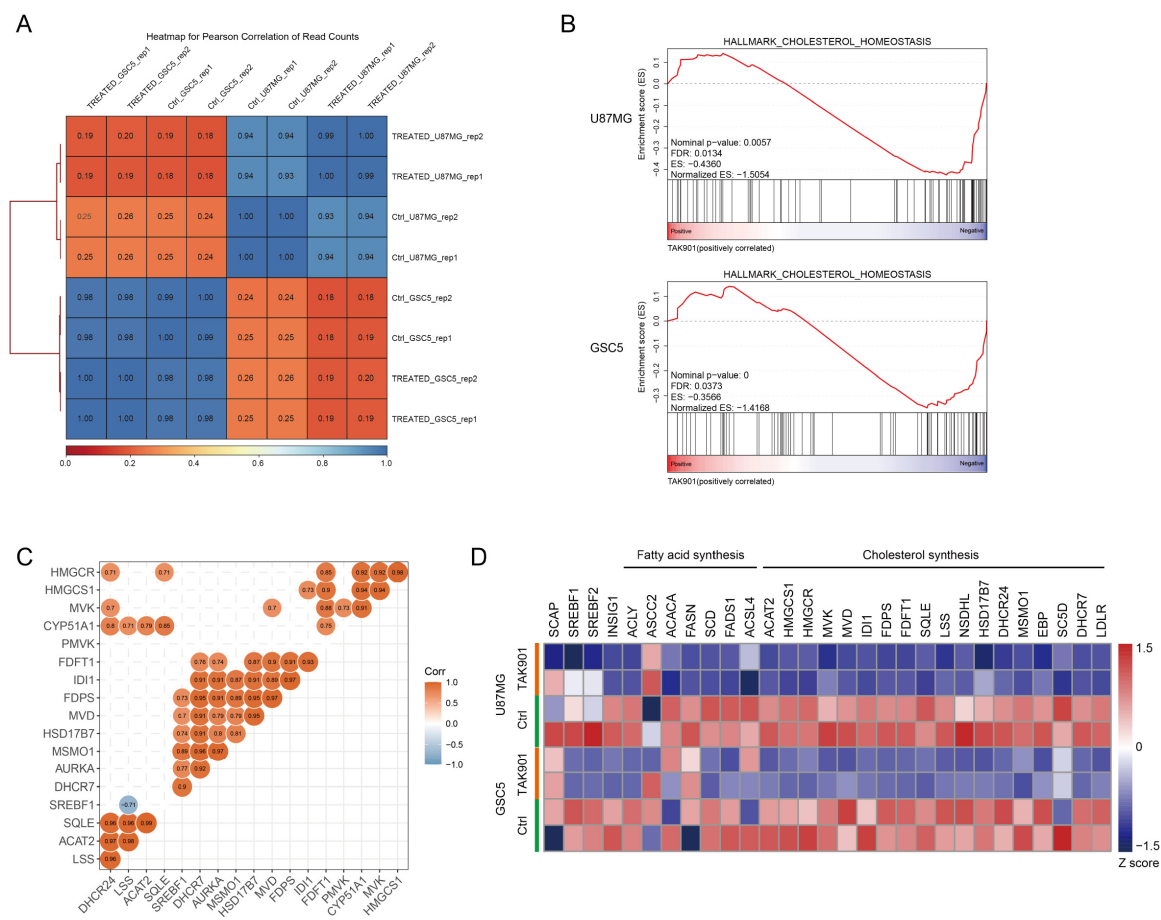

**Supplementary Figure S2.** Western blotting of SREBP1 in U87MG and cell viability of U87MG overexpress SREBP2. U87MG cells were treated with different concentration of TAK901 or vehicle for 72h.

- (A) Western blot analysis of the protein expression of full-length SREBP1, mature SREBP1, full-length SREBP1, mature SREBP1, pGSK3 $\beta$  and c-Myc in U87MG cells (left). U87MG cells were treated with different concentration of TAK901 or vehicle for 72h. Quantification of each band was shown (right).

**(B)** U87MG cells were transfected with a plasmid overexpressing mSREBF2. The cell viability was calculated after treatment with different concentrations of TAK901 (n=6).

**(C)** Flow cytometry analysis of apoptotic U87MG cells. Cells were treated with 10  $\mu$ M of TAK901 (n=3).

Significance was determined by unpaired and two-tailed Student's t-test (B, C). \*P<0.05, \*\*P<0.001, \*\*\*P<0.001, \*\*\*\*P<0.0001.

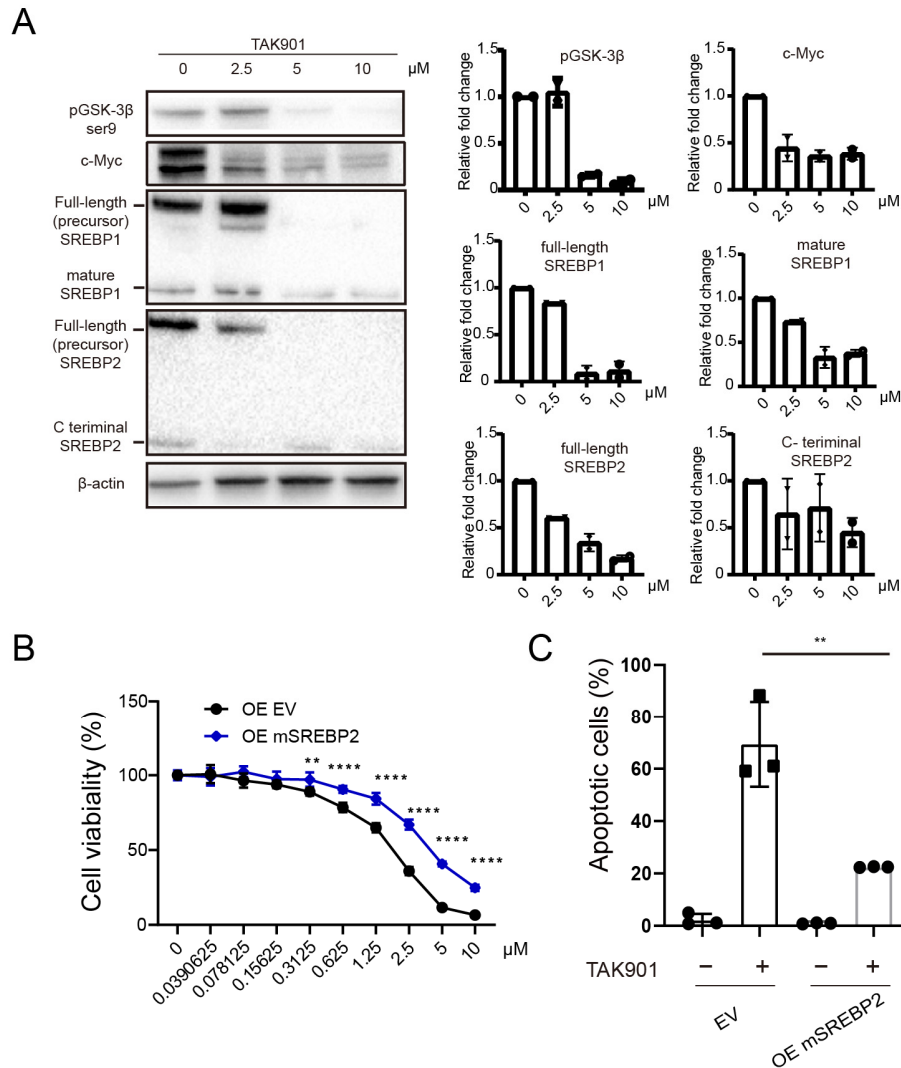

**Supplementary Figure S3.** TAK901 suppress histone H3 phosphorylation in GBM cells.

**(A)** Western blot analysis of the protein expression of phospho-histone H3 (Ser10) and histone H3 in U87MG cells. U87MG cells were treated with different concentration of TAK901 or vehicle for 72h. Quantification of each band was shown (right).

**(B)** Western blot analysis of the protein expression of phospho-histone H3 (Ser10) and histone H3 in GSC5 cells. GSC5 cells were treated with different concentration of TAK901 or vehicle for 72h. Quantification of each band was shown (right).

**(C)** Western blot analysis of the protein expression of Aurora A and B in U87MG and GSC5 cells.

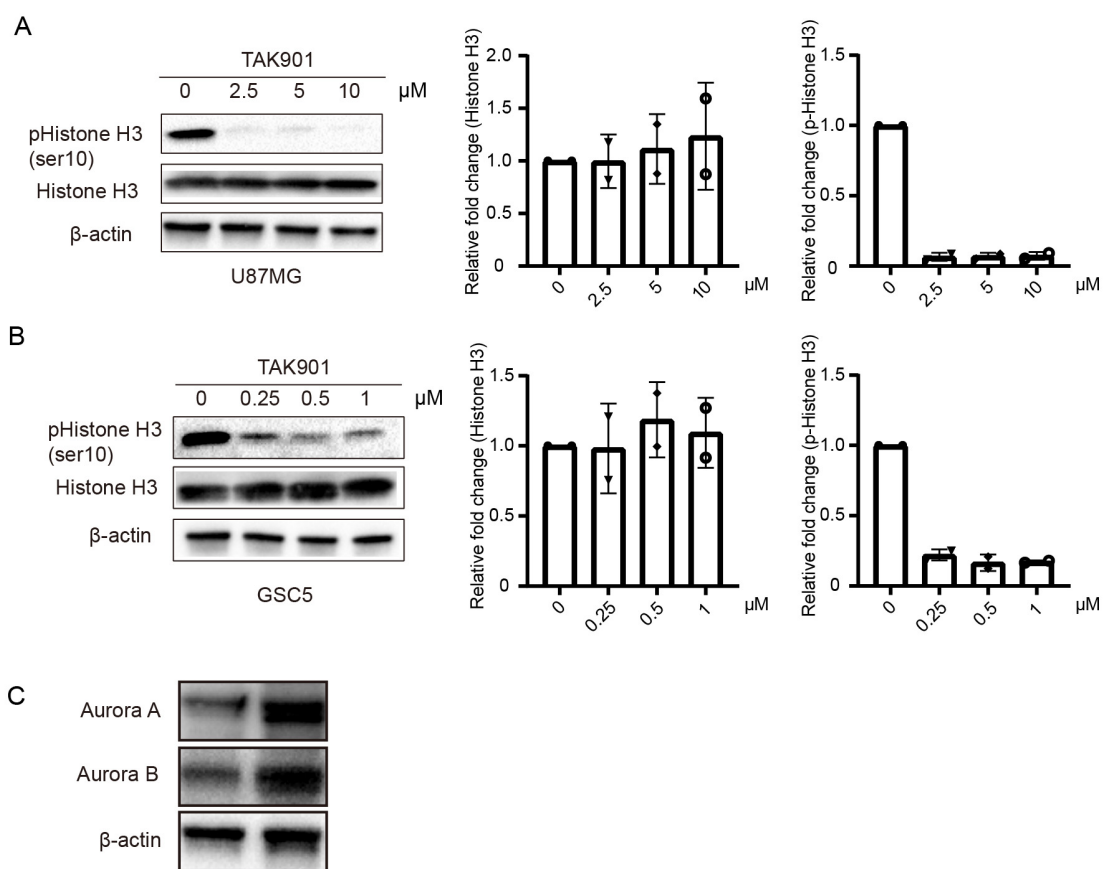

Supplement: s1 [file s1]
